# Supplementary material for: Asthma is associated with frailty among community-dwelling adults: the GAZEL cohort
Source: PubMed Central journal article supplement — BMJ Open Respir Res. 2020 Feb 16;7(1):e000526. doi: 10.1136/bmjresp-2019-000526 (PMC7047496; doi:10.1136/bmjresp-2019-000526), 2020-02-16
Supplement: bmjresp-2019-000526supp002.pdf [file bmjresp-2019-000526supp002.pdf]

## Supplementary Material: tables

### Asthma is associated with frailty among community-dwelling adults – the GAZEL cohort.

*Benjamin Landré*<sup>1</sup>, *Rachel Nadif*<sup>2</sup>, *Marcel Goldberg*<sup>3,4</sup>, Julie Gourmelen<sup>3</sup>, *Marie Zins*<sup>3,4</sup>,  
*Joël Ankri*<sup>1,5</sup>, *Marie Herr*<sup>1,5</sup>

#### Affiliations:

1. Université Paris-Saclay, UVSQ, Univ. Paris-Sud, Inserm, Echappement aux anti-infectieux et pharmaco-épidémiologie, CESP, 94807, Villejuif, France.;
2. Université Paris-Saclay, UVSQ, Univ. Paris-Sud, Inserm, Équipe d'Épidémiologie Respiratoire Intégrative, CESP, 94807, Villejuif, France ;
3. INSERM, UMS 011, Population-based Epidemiological Cohorts, 94807, Villejuif, France;
4. Faculty of Medicine, Paris Descartes University, Paris, France;
5. Département Hospitalier d'Épidémiologie et de Santé Publique, Hôpitaux Universitaires Paris Ile-de-France Ouest, Assistance Publique-Hôpitaux de Paris, Paris, France.

#### Corresponding author:

Rachel Nadif, Université Paris-Saclay, UVSQ, Inserm, CESP, Équipe d'Épidémiologie Respiratoire Intégrative, 94807, Villejuif, France ;

Phone number: 33 (0) 145595189

Email: [rachel.nadif@inserm.fr](mailto:rachel.nadif@inserm.fr)

1 **Table A1: Prevalence of frail (F), pre-frail (P-F) and robust (R) among participants with current asthma (CA) and without current asthma**  
 2 **(NCA) according to BMI category in 2015**  
 3

| Asthma definition                                          |     | Normal BMI |                  |                  |               | Overweight BMI |                  |                  |                | Obese BMI |                |                |                |
|------------------------------------------------------------|-----|------------|------------------|------------------|---------------|----------------|------------------|------------------|----------------|-----------|----------------|----------------|----------------|
|                                                            |     | All        | R                | P-F              | F             | All            | R                | P-F              | F              | All       | R              | P-F            | F              |
| <b>Current asthma in 2015</b>                              | CA  | 131        | 72<br>(55.0%)    | 44<br>(33.6%)    | 15<br>(11.5%) | 143            | 72<br>(50.4%)    | 60<br>(42.0%)    | 11<br>(7.7%)   | 86        | 31<br>(36.1%)  | 36<br>(41.9%)  | 19<br>(22.1%)  |
|                                                            | NCA | 4,605      | 3,108<br>(67.5%) | 1,316<br>(28.6%) | 181<br>(3.9%) | 5,203          | 3,163<br>(60.8%) | 1,798<br>(34.6%) | 242<br>(4.7%)  | 1,616     | 604<br>(37.4%) | 809<br>(50.1%) | 203<br>(12.6%) |
| <b>Current asthma in 2002</b>                              | CA  | 458        | 260<br>(56.8%)   | 163<br>(36.6%)   | 35<br>(7.6%)  | 621            | 298<br>(48.0%)   | 269<br>(43.3%)   | 54<br>(8.7%)   | 304       | 83<br>(27.3%)  | 154<br>(50.7%) | 67<br>(22.0%)  |
|                                                            | NCA | 2,632      | 1,832<br>(69.6%) | 701<br>(26.6%)   | 99<br>(3.8%)  | 2,844          | 1,788<br>(62.9%) | 951<br>(33.4%)   | 105<br>(3.7%)  | 807       | 329<br>(40.8%) | 395<br>(49.0%) | 83<br>(10.3%)  |
| <b>Constant report of current asthma from 1990 to 2015</b> | CA  | 33         | 14<br>(42.4%)    | 14<br>(42.4%)    | 5<br>(15.15%) | 41             | 24<br>(58.5%)    | 12<br>(29.3%)    | 5<br>(12.2%)   | 25        | 7<br>(28%)     | 13<br>(52%)    | 5<br>(20%)     |
|                                                            | NCA | 2,500      | 1,739<br>(69.6%) | 671<br>(26.8%)   | 90<br>(3.6%)  | 2,712          | 1,704<br>(62.8%) | 912<br>(33.6%)   | 96<br>(3.5%)   | 736       | 300<br>(40.8%) | 362<br>(49.2%) | 74<br>(10.1%)  |
| <b>At least one report between 1990 and 2015</b>           | CA  | 410        | 253<br>(61.7%)   | 129<br>(34.5%)   | 28<br>(6.8%)  | 446            | 240<br>(53.8%)   | 170<br>(38.1%)   | 36<br>(8.1%)   | 245       | 83<br>(33.9%)  | 115<br>(46.9%) | 47<br>(19.2%)  |
|                                                            | NCA | 4,326      | 2,927<br>(67.7%) | 1,231<br>(28.5%) | 168<br>(3.9%) | 4,900          | 2,995<br>(61.1%) | 1,668<br>(34.5%) | 217<br>(4.43%) | 1,457     | 552<br>(38.9%) | 730<br>(50.1%) | 175<br>(12.0%) |
| <b>Sensibility</b>                                         | CA  | 51         | 26<br>(51.0%)    | 19<br>(37.3%)    | 6<br>(11.8%)  | 63             | 36<br>(57.1%)    | 22<br>(34.9%)    | 5<br>(7.9%)    | 34        | 11<br>(32.4%)  | 15<br>(44.1%)  | 8<br>(23.5%)   |
|                                                            | NCA | 4,685      | 3,154<br>(67.3%) | 1,341<br>(28.6%) | 190<br>(4.1%) | 5,283          | 3,199<br>(60.6%) | 1,836<br>(34.8%) | 248<br>(4.7%)  | 1,668     | 624<br>(37.4%) | 830<br>(49.8%) | 214<br>(12.8%) |

4 BMI: body mass index ; CA: current asthmatic; NCA: non-current asthmatic; R: robust ; P-F: pre-frail; F: frail

5 **Table A2: Characteristics of participants according to their report of current asthma in**  
 6 **2002.**

| Characteristics in 2015                                            | Participants without current asthma<br>(n= 6,560) | Participants with current asthma<br>(n= 1,456) |
|--------------------------------------------------------------------|---------------------------------------------------|------------------------------------------------|
| <b>Age, years, mean ± SD</b>                                       | 69.9 (± 3.4)                                      | 70.0 (± 3.5)                                   |
| <b>Women, n (%)</b>                                                | 1,583 (24)                                        | 398 (27)                                       |
| <b>Marital status, N (%)</b>                                       |                                                   |                                                |
| Living alone                                                       | 1,082 (17)                                        | 304 (21)                                       |
| <b>Education level, n (%)</b>                                      |                                                   |                                                |
| < High school                                                      | 1,256 (19)                                        | 274 (19)                                       |
| High school                                                        | 3,691 (57)                                        | 861 (60)                                       |
| University & other                                                 | 1,520 (24)                                        | 295 (21)                                       |
| <b>Body Mass Index, kg/m<sup>2</sup>, mean ± SD</b>                | 25.9 ± 3.8                                        | 27.0 ± 4.4                                     |
| Obese, N (%)                                                       | 807 (12)                                          | 304 (21)                                       |
| <b>Current tobacco consumption, n (%)</b>                          |                                                   |                                                |
| Non smoker                                                         | 2,515 (44)                                        | 476 (38)                                       |
| Current smoker                                                     | 360 (6)                                           | 142 (11)                                       |
| Former smoker                                                      | 2,784 (49)                                        | 627 (50)                                       |
| <b>Frailty, n (%)</b>                                              |                                                   |                                                |
| Robust                                                             | 4,117 (63)                                        | 681 (47)                                       |
| Pre-frail                                                          | 2,140 (33)                                        | 614 (42)                                       |
| Frail                                                              | 303 (5)                                           | 161 (11)                                       |
| <b>Symptoms reported in 2002</b>                                   |                                                   |                                                |
| Asthma attack in the last 12 months?                               | 0                                                 | 242 (17)                                       |
| Wheezing in the chest, at any moment, in the last 12 months? (Yes) | 0                                                 | 868 (60)                                       |
| Woken up with difficulty breathing in the last 12 months?          | 0                                                 | 808 (57)                                       |
| Woken up with a breathlessness in the last 12 months?              | 0                                                 | 176 (13)                                       |
| Any asthma medications?                                            | 0                                                 | 300 (21)                                       |

7

8

Table A3: Characteristics of the participants in 2015 according to frailty status and current asthma 2015 status.

|                                                        | Robust                         |                          |                      | Pre-frail                      |                          |                      | Frail                        |                         |                      |
|--------------------------------------------------------|--------------------------------|--------------------------|----------------------|--------------------------------|--------------------------|----------------------|------------------------------|-------------------------|----------------------|
|                                                        | Non current asthma (N = 7 198) | Current asthma (N = 183) | P-value <sup>1</sup> | Non current asthma (N = 4 116) | Current asthma (N = 142) | P-value <sup>1</sup> | Non current asthma (N = 659) | Current asthma (N = 47) | P-value <sup>1</sup> |
| <b>Age</b> , years, mean ± SD                          | 69.7 +/- 3.4                   | 69.9 +/- 3.5             | 0.49                 | 70.0 +/- 3.5                   | 69.5 +/- 3.6             | 0.15                 | 70.4 +/- 3.6                 | 70.7 +/- 3.3            | 0.57                 |
| <b>Sex</b> , n (%)                                     | 1 673 (23)                     | 47 (26)                  | 0.50                 | 1 155 (28)                     | 53 (37)                  | 0.02                 | 288 (44)                     | 22 (47)                 | 0.79                 |
| Female                                                 |                                |                          |                      |                                |                          |                      |                              |                         |                      |
| <b>Marital status</b> , n (%)                          | 1 140 (16)                     | 24 (13)                  | 0.38                 | 801 (20)                       | 35 (25)                  | 0.15                 | 173 (27)                     | 13 (28)                 | 0.93                 |
| Living alone                                           |                                |                          |                      |                                |                          |                      |                              |                         |                      |
| <b>Education</b> , n (%)                               | 1 351 (19)                     | 28 (16)                  | 0.99                 | 822 (20)                       | 29 (21)                  | 0.99                 | 171 (26)                     | 11 (25)                 |                      |
| < High school                                          |                                |                          |                      |                                |                          |                      |                              |                         |                      |
| High school                                            | 4 096 (58)                     | 105 (58)                 |                      | 2466(61)                       | 85 (61)                  |                      | 378 (58)                     | 26 (59)                 |                      |
| University & other                                     | 1 643 (23)                     | 47 (26)                  |                      | 744 (18)                       | 25 (18)                  |                      | 98 (18)                      | 7 (16)                  |                      |
| <b>Body Mass Index</b> , kg/m <sup>2</sup> , mean ± SD | 25.5 +/- 3.3                   | 26.0 +/- 3.7             | 0.10                 | 26.8 +/- 4.2                   | 27.4 +/- 4.5)            | 0.12                 | 28.0 +/- 5.1                 | 29.1 +/- 8.0            | 0.98                 |
| Obese (BMI ≥ 30kg/m <sup>2</sup> ), N (%)              | 604 (9)                        | 31 (18)                  | < 0.001              | 809 (21)                       | 36 (25)                  | 0.15                 | 203 (32)                     | 19 (42)                 | 0.35                 |
| <b>Current consumption, Tobacco</b> , n (%)            | 2 798 (45)                     | 74 (49)                  | 0.55                 | 1 467 (42)                     | 48 (40)                  | 0.88                 | 2210 (39)                    | 20 (50)                 | 0.28                 |
| Non smoker                                             |                                |                          |                      |                                |                          |                      |                              |                         |                      |
| Current smoker                                         | 393 (6)                        | 7 (5)                    |                      | 305 (9)                        | 11 (9)                   |                      | 57 (11)                      | 5 (15)                  |                      |
| Former smoker                                          | 3 003 (48)                     | 71 (47)                  |                      | 1 693 (49)                     | 61 (51)                  |                      | 270 (50)                     | 15 (38)                 |                      |
| <b>Mood</b> , n (%)                                    | 868 (12)                       | 29 (16)                  | 0.15                 | 1104 (27)                      | 51 (36)                  | 0.02                 | 321 (49)                     | 27 (58)                 | 0.31                 |
| Depressed, stressed or anxious                         |                                |                          |                      |                                |                          |                      |                              |                         |                      |
| <b>Other chronic diseases</b> , N (%)                  |                                |                          |                      |                                |                          |                      |                              |                         |                      |
| Heart diseases                                         | 469 (7)                        | 12 (7)                   | 1                    | 311 (8)                        | 6 (4)                    | 0.16                 | 52 (8)                       | 3 (7)                   | 1                    |
| Diabetes                                               | 618 (9)                        | 21 (12)                  | 0.22                 | 577 (14)                       | 26 (18)                  | 0.19                 | 134 (20)                     | 9 (19)                  | 0.99                 |
| Joint pain                                             | 2606 (36)                      | 75 (41)                  | 0.21                 | 2037 (50)                      | 83 (59)                  | 0.04                 | 470 (71)                     | 34 (72)                 | 1                    |
| Cancer                                                 | 859 (12)                       | 28 (16)                  | 0.21                 | 518 (13)                       | 17 (12)                  | 0.81                 | 100 (16)                     | 8 (18)                  | 0.91                 |

1 p-value of t-test for continuous variables and chi-squared test for categorical variables

**Table A4: Association between current asthma and frailty criteria.**

| Asthma definition                                              |       | OR                 | OR                 | OR                 | OR                 | OR                       |
|----------------------------------------------------------------|-------|--------------------|--------------------|--------------------|--------------------|--------------------------|
|                                                                |       | of exhaustion      | of weight loss     | of slowness        | of weakness        | of low physical activity |
|                                                                |       | [95%CI]            | [95%CI]            | [95%CI]            | [95%CI]            | [95%CI]                  |
| <b>Current asthma in 2015</b>                                  | Crude | 1.60 [1.52 - 2.07] | 1.32 [0.86 - 1.94] | 2.23 [1.75 - 2.82] | 2.05 [1.49 - 2.76] | 1.27 [1.00 - 1.60]       |
|                                                                | M2    | 1.60 [1.17 - 2.14] | 1.53 [0.95 - 2.33] | 1.94 [1.43 - 2.59] | 1.64 [1.10 - 2.38] | 1.19 [0.90 - 1.55]       |
|                                                                | M3    | 1.40 [1.00 - 1.90] | 1.39 [0.86 - 2.15] | 1.84 [1.35 - 2.48] | 1.53 [1.01 - 2.25] | 1.14 [0.87 - 1.49]       |
| <b>Current asthma in 2002</b>                                  | Crude | 2.15 [1.85 - 2.49] | 1.47 [1.17 - 1.82] | 2.27 [1.97 - 2.63] | 2.16 [1.79 - 2.61] | 1.40 [1.23 - 1.59]       |
|                                                                | M2    | 1.96 [1.65 - 2.33] | 1.76 [1.37 - 2.25] | 1.98 [1.67 - 2.35] | 1.87 [1.49 - 2.35] | 1.19 [1.02 - 1.38]       |
|                                                                | M3    | 1.63 [1.35 - 1.96] | 1.52 [1.17 - 1.97] | 1.75 [1.46 - 2.08] | 1.53 [1.20 - 1.94] | 1.11 [0.95 - 1.30]       |
| <b>Constant report of current asthma between 1990 and 2015</b> | Crude | 1.70 [0.99 - 2.78] | 2.22 [1.11 - 4.02] | 3.19 [2.04 - 4.87] | 2.45 [1.30 - 4.28] | 1.48 [0.95 - 2.25]       |
|                                                                | M2    | 1.72 [0.91 - 3.02] | 2.66 [1.16 - 5.35] | 2.76 [1.58 - 4.69] | 1.63 [0.68 - 3.42] | 1.36 [0.80 - 2.22]       |
|                                                                | M3    | 1.35 [0.69 - 2.50] | 2.40 [1.03 - 4.92] | 2.86 [1.60 - 4.95] | 1.53 [0.60 - 3.35] | 1.31 [0.77 - 2.15]       |
| <b>At least one report between 1990 and 2005</b>               | Crude | 1.40 [1.14 - 1.71] | 1.55 [1.16 - 2.03] | 1.78 [1.48 - 2.14] | 1.96 [1.55 - 2.46] | 1.11 [0.93 - 1.32]       |
|                                                                | M2    | 1.22 [0.96 - 1.54] | 1.63 [1.17 - 2.22] | 1.56 [1.24 - 1.96] | 1.55 [1.15 - 2.05] | 1.01 [0.82 - 1.24]       |
|                                                                | M3    | 1.01 [0.78 - 1.30] | 1.51 [1.08 - 2.08] | 1.38 [1.09 - 1.75] | 1.36 [1.00 - 1.82] | 0.96 [0.78 - 1.18]       |

Results are expressed as OR: odds-ratio ; 95%CI: 95 percent confidence interval ;

Model 2 (M2) : adjusted for sex, age (continuous), body mass index (continuous), education, marital status, tobacco consumption ;

Model 3 (M3): further adjustment on diabetes, joint pain, cancer, cardiac diseases and mental status.

*Sensibility: Participants who constantly reported current asthma, or only once, in 2015, were considered as having current asthma; otherwise they were considered as not having current asthma.*
